# Supplementary material
Source: PubMed Central journal article supplement (PMC11071952)
Supplement: 18_2022_4422_MOESM1_ESM.pdf [file 18_2022_4422_MOESM1_ESM.pdf]

**Table S1: Ran-Q69L-interacting proteins identified by mass spectrometry from Huh-7 sEVs**

| <b>Sl. No</b> | <b>Protein ID</b> | <b>Protein Name</b>                        |
|---------------|-------------------|--------------------------------------------|
| 1             | P04406            | Glyceraldehyde-3-phosphate dehydrogenase   |
| 2             | P09651            | Heterogeneous nuclear ribonucleoprotein A1 |
| 3             | P11142            | Heat shock cognate 71 kDa protein          |
| 4             | P12235            | ADP/ATP translocase 1                      |
| 5             | P14618            | Pyruvate kinase PKM                        |
| 6             | P15880            | 40S ribosomal protein S2                   |
| 7             | P60709            | Actin, cytoplasmic 1                       |
| 8             | P61247            | 40S ribosomal protein S3a                  |
| 9             | P68363            | Tubulin alpha-1B chain                     |
